# Supplementary material for: Multi-Omics Integrative Bioinformatics Analyses Reveal Long Non-coding RNA Modulates Genomic Integrity via Competing Endogenous RNA Mechanism and Serves as Novel Biomarkers for Overall Survival in Lung Adenocarcinoma
Source: Front Cell Dev Biol. 2021 Jul 22;9:691540. doi: 10.3389/fcell.2021.691540 (PMC8339593; doi:10.3389/fcell.2021.691540)
Supplement: Supplementary file 4 [file Table_1.XLSX]

## Sheet: Sheet1
Table S1. Normality test of the indexes utilized in genome instability, immune, drug sensitivity, and cancer stemness analysis
Normality test
Cancer stemness		Kolmogorov-Smirnov(V)			Genome instability		Kolmogorov-Smirnov(V)			Drug sensitivity	Kolmogorov-Smirnov(V)			Immune		Kolmogorov-Smirnov(V)
DNAss	Cancertype	Stats	df	Sig	TMB	CancerType	Stats	df	Sig	Drug Names	Stats	df	Sig	StromalScore	CancerType	Stats	df	Sig
	ACC	0.0861863	78	.200*		ACC	0.381998	92	5.20622e-38	Curcumin	0.208397	5	.200*		ACC	0.120771	79	0.0061958
	BLCA	0.0640195	423	0.000272961		BLCA	0.210847	412	6.76483e-51	3-Bromopyruvate (acid)	0.345614	5	0.0508323		BLCA	0.0613615	411	0.000804375
	BRCA	0.0921166	855	5.22813e-19		BRCA	0.379981	986	0	Cordycepin	0.196499	5	.200*		BRCA	0.0475568	1104	3.82211e-06
	CESC	0.116863	306	7.4352e-11		CESC	0.397348	289	9.67231e-132	Benzimate	0.174057	5	.200*		CESC	0.0364425	306	.200*
	CHOL	0.0531652	45	.200*		CHOL	0.430593	51	5.76732e-27	Pimozide	0.221921	5	.200*		CHOL	0.109057	36	.200*
	COAD	0.0586374	310	0.0120588		COAD	0.395583	399	1.47421e-180	Elesclomol	0.39417	5	0.0107455		COAD	0.0303867	471	.200*
	DLBC	0.116714	48	0.0996985		DLBC	0.100557	37	.200*	Wortmannin	0.186959	5	.200*		DLBC	0.0865138	48	.200*
	ESCA	0.138132	166	3.29484e-08		ESCA	0.291179	184	8.59871e-44	geldanamycin analog	0.426017	5	0.00337194		ESCA	0.076836	162	0.0206711
	GBM	0.151314	64	0.000919421		GBM	0.470529	390	1.17416e-251	Elliptinium Acetate	0.149325	5	.200*		GBM	0.0431949	168	.200*
	HNSC	0.150897	516	7.1477e-32		HNSC	0.260164	506	6.41368e-97	Triciribine phosphate	0.181236	5	.200*		HNSC	0.0391839	502	0.0631065
	KICH	0.154205	64	0.000652534		KICH	0.392023	66	1.1175e-28	BEN	0.225267	5	.200*		KICH	0.094773	65	.200*
	KIRC	0.0793867	336	2.65038e-05		KIRC	0.153353	336	3.2977e-21	Amonafide	0.24379	5	.200*		KIRC	0.063421	535	2.43069e-05
	KIRP	0.116124	293	3.06239e-10		KIRP	0.0491216	281	0.0983113	Batracylin	0.25454	5	.200*		KIRP	0.077051	289	0.000280733
	LAML	0.0721536	142	0.0674311		LAML	0.435454	134	3.58959e-73	Buthionine sulphoximine	0.200054	5	.200*		LAML	0.0621678	151	.200*
	LGG	0.169722	527	1.2216e-41		LGG	0.468043	506	0	Tanespimycin	0.240707	5	.200*		LGG	0.0663167	529	8.54167e-06
	LIHC	0.0847882	412	1.66868e-07		LIHC	0.264111	364	1.28176e-71	8-Chloro-adenosine	0.1403	5	.200*		LIHC	0.0698953	374	0.000153419
	LUAD	0.0725279	475	2.93867e-06		LUAD	0.184564	561	7.49376e-53	Hypothemycin	0.207086	5	.200*		LUAD	0.0328939	526	.200*
	LUSC	0.161323	370	4.71549e-26		LUSC	0.180843	491	3.23318e-44	Fostamatinib	0.312978	5	0.123008		LUSC	0.0339423	501	.200*
	MESO	0.0801639	86	.200*		MESO	0.289582	80	1.95078e-18	Pyrazoloacridine	0.251345	5	.200*		MESO	0.0831719	86	.200*
	OV	0.197314	7	.200*		OV	0.154024	436	5.49232e-28	Fenretinide	0.334677	5	0.0696216		OV	0.0514082	379	0.0176367
	PAAD	0.0937686	160	0.00155378		PAAD	0.506463	158	4.48178e-118	Staurosporine	0.266463	5	.200*		PAAD	0.0735026	178	0.0202762
	PCPG	0.0626293	185	0.0740778		PCPG	0.131885	178	5.29749e-08	Lapachone	0.17992	5	.200*		PCPG	0.0400578	183	.200*
	PRAD	0.0376077	527	0.0724063		PRAD	0.45515	484	7.75227e-292	O-6-Benzylguanine	0.222776	5	.200*		PRAD	0.0391828	499	0.0646412
	READ	0.0893779	96	0.0562768		READ	0.45602	136	1.01201e-81	7-Hydroxystaurosporine	0.194397	5	.200*		READ	0.0743142	167	0.0250856
	SARC	0.0835322	258	0.000166133		SARC	0.386771	237	5.08704e-102	Perifosine	0.184937	5	.200*		SARC	0.0668229	263	0.00640717
	SKCM	0.0638077	472	9.23604e-05		SKCM	0.297686	467	5.54555e-118	Alvocidib	0.22336	5	.200*		SKCM	0.0473717	471	0.0133142
	STAD	0.0993482	326	3.15e-08		STAD	0.33276	433	1.79274e-137	Midostaurin	0.229976	5	.200*		STAD	0.0331135	375	.200*
	TGCT	0.0728836	155	0.0429997		TGCT	0.105094	145	0.000482836	XK-469	0.22825	5	.200*		TGCT	0.0829278	156	0.0106753
	THCA	0.0517924	554	0.00120825		THCA	0.173672	487	2.67201e-40	Triapine	0.200065	5	.200*		THCA	0.0361856	510	0.144953
	THYM	0.165099	121	1.26744e-08		THYM	0.408157	122	3.67575e-58	kahalide f	0.202171	5	.200*		THYM	0.139858	119	5.5561e-06
	UCEC	0.0772942	451	8.82199e-07		UCEC	0.350289	529	8.45735e-187	okadaic acid	0.198791	5	.200*		UCEC	0.0324906	548	.200*
	UCS	0.0810129	56	.200*		UCS	0.462568	57	5.17013e-35	PD-98059	0.322384	5	0.0976171		UCS	0.109257	56	0.0932148
	UVM	0.0793273	80	.200*		UVM	0.44312	80	5.57369e-45	Epothilone B		5			UVM	0.0629969	80	.200*
RNAss	ACC	0.0786553	78	.200*	MSI	ACC	0.251243	92	9.13544e-16	Aminoflavone	0.289582	5	0.197922	ImmuneScore	ACC	0.130701	79	0.00193629
	BLCA	0.0468425	423	0.0266984		BLCA	0.100204	412	1.1327e-10	BN-2629	0.31463	5	0.118538		BLCA	0.0740652	411	1.22679e-05
	BRCA	0.0336226	855	0.023305		BRCA	0.102453	1044	3.4049e-29	LY-294002	0.138147	5	.200*		BRCA	0.0521331	1104	1.88578e-07
	CESC	0.0849552	306	1.49582e-05		CESC	0.209092	305	8.73405e-37	RH1	0.240268	5	.200*		CESC	0.047281	306	0.0958386
	CHOL	0.138212	45	0.0308736		CHOL	0.404129	51	1.33828e-23	5-fluoro deoxy uridine 10mer	0.358037	5	0.0350023		CHOL	0.111713	36	.200*
	COAD	0.0688944	310	0.00119102		COAD	0.361872	431	1.52132e-162	Seliciclib	0.289936	5	0.196656		COAD	0.0278165	471	.200*
	DLBC	0.0729906	48	.200*		DLBC	0.0885246	48	.200*	Entinostat	0.234022	5	.200*		DLBC	0.082875	48	.200*
	ESCA	0.0586869	166	.200*		ESCA	0.40548	184	4.574e-87	Alvespimycin	0.28098	5	.200*		ESCA	0.0588237	162	.200*
	GBM	0.0568382	64	.200*		GBM	0.144316	396	4.14594e-22	7-Tert-butyldimethylsilyl-10-hydroxycamptothecin	0.247526	5	.200*		GBM	0.0522943	168	.200*
	HNSC	0.0459216	516	0.0113251		HNSC	0.191238	510	1.22874e-51	Karenitecin	0.342452	5	0.0557461		HNSC	0.042409	502	0.0311527
	KICH	0.0973236	64	.200*		KICH	0.15435	66	0.000484379	PX-316	0.359062	5	0.0339158		KICH	0.0620213	65	.200*
	KIRC	0.0508311	336	0.0361734		KIRC	0.161024	339	1.02252e-23	AFP464	0.326005	5	0.0885188		KIRC	0.0357078	535	0.107091
	KIRP	0.0561475	293	0.0263587		KIRP	0.0573535	288	0.0231006	Rebimastat		5			KIRP	0.0467465	289	.200*
	LAML	0.0383482	142	.200*		LAML	0.050903	146	.200*	Imexon	0.173949	5	.200*		LAML	0.0492342	151	.200*
	LGG	0.0448936	527	0.0131103		LGG	0.0853557	513	1.52265e-09	E-7820	0.263674	5	.200*		LGG	0.0564388	529	0.000379216
	LIHC	0.0257202	412	.200*		LIHC	0.137399	375	7.55668e-19	LMP-400	0.209412	5	.200*		LIHC	0.064587	374	0.000734855
	LUAD	0.0344407	475	.200*		LUAD	0.0450333	569	0.00795303	LMP776	0.204322	5	.200*		LUAD	0.0416957	526	0.0293915
	LUSC	0.0633302	370	0.00114138		LUSC	0.145016	496	3.69784e-28	Lificguat	0.433667	5	0.00251083		LUSC	0.0363056	501	0.151901
	MESO	0.074451	86	.200*		MESO	0.217347	83	1.90639e-10	SR16157	0.290222	5	0.195636		MESO	0.039367	86	.200*
	OV	0.150466	7	.200*		OV	0.152638	437	1.58596e-27	Dimethylaminoparthenolide	0.191157	5	.200*		OV	0.0402449	379	0.184181
	PAAD	0.0804273	160	0.0132702		PAAD	0.0718464	183	0.022363	Selumetinib	0.257297	5	.200*		PAAD	0.0315185	178	.200*
	PCPG	0.0537812	185	.200*		PCPG	0.149985	179	1.47792e-10	BML-277	0.191262	5	.200*		PCPG	0.0568799	183	.200*
	PRAD	0.0272807	527	.200*		PRAD	0.126575	498	3.00434e-21	Obatoclax	0.247691	5	.200*		PRAD	0.0657598	499	2.30435e-05
	READ	0.0664232	96	.200*		READ	0.360616	157	3.93722e-58	AT-13387	0.16373	5	.200*		READ	0.063017	167	.200*
	SARC	0.0302149	258	.200*		SARC	0.0960858	255	5.87464e-06	Salinomycin	0.198413	5	.200*		SARC	0.0434432	263	.200*
	SKCM	0.0585723	472	0.000543804		SKCM	0.0666117	470	3.49382e-05	Itraconazole	0.229762	5	.200*		SKCM	0.0648473	471	6.51404e-05
	STAD	0.0722529	326	0.000312172		STAD	0.411895	440	2.41108e-216	XL-147	0.229169	5	.200*		STAD	0.0444743	375	0.0718603
	TGCT	0.189755	155	6.05085e-15		TGCT	0.0420691	150	.200*	Hydrastinine HCl	0.208109	5	.200*		TGCT	0.0534429	156	.200*
	THCA	0.0437134	554	0.0134457		THCA	0.0548188	496	0.00115565	1st Precursor Intermediate to TDP 665759	0.327654	5	0.0846201		THCA	0.0706472	510	2.26375e-06
	THYM	0.142771	121	2.3616e-06		THYM	0.386583	123	2.18282e-52	(+)-JQ1	0.172639	5	.200*		THYM	0.160177	119	5.93875e-08
	UCEC	0.0583933	451	0.000865139		UCEC	0.294637	542	3.21983e-134	Fenretinide	0.231141	5	.200*		UCEC	0.051219	548	0.00159214
	UCS	0.0995195	56	.200*		UCS	0.428517	57	7.85651e-30	AP-26113	0.285155	5	.200*		UCS	0.109993	56	0.0887006
	UVM	0.0606356	80	.200*		UVM	0.0794544	80	.200*	By-Product of CUDC-305	0.330127	5	0.0790516		UVM	0.151252	80	0.000106261
										LOR-253	0.231008	5	.200*	ESTIMATEScore	ACC	0.154437	79	7.5965e-05
										Pelitrexol	0.433408	5	0.00253629		BLCA	0.065108	411	0.000258027
										Cobimetinib (isomer 1)	0.172173	5	.200*		BRCA	0.020574	1104	.200*
										Bafetinib	0.24196	5	.200*		CESC	0.0287809	306	.200*
										Methotrexate	0.190809	5	.200*		CHOL	0.0587863	36	.200*
										6-Mercaptopurine	0.241235	5	.200*		COAD	0.0263285	471	.200*
										6-Mercaptopurine	0.242718	5	.200*		DLBC	0.0747901	48	.200*
										Nitrogen mustard	0.164966	5	.200*		ESCA	0.0518372	162	.200*
										Allopurinol	0.227186	5	.200*		GBM	0.040412	168	.200*
										Actinomycin D	0.3	5	0.160714		HNSC	0.0293665	502	.200*
										Chlorambucil	0.138449	5	.200*		KICH	0.0795619	65	.200*
										Thiotepa	0.233237	5	.200*		KIRC	0.0627415	535	3.19281e-05
										Melphalan	0.117853	5	.200*		KIRP	0.0540505	289	0.0405976
										Triethylenemelamine	0.225432	5	.200*		LAML	0.0703619	151	0.0647959
										Dromostanolone Propionate	0.233919	5	.200*		LGG	0.0545969	529	0.000710351
										Acrichine	0.340001	5	0.059835		LIHC	0.0559742	374	0.00681288
										Fluorouracil	0.191781	5	.200*		LUAD	0.035711	526	0.150371
										Nandrolone phenpropionate	0.234529	5	.200*		LUSC	0.0317296	501	.200*
										Testolactone	0.445124	5	0.00159526		MESO	0.0628825	86	.200*
										Mithramycin	0.294751	5	0.17946		OV	0.0392729	379	.200*
										Pipobroman	0.189574	5	.200*		PAAD	0.0527505	178	.200*
										Cyclophosphamide		5			PCPG	0.0534038	183	.200*
										Mitomycin	0.342253	5	0.0560689		PRAD	0.0417624	499	0.0371087
										Floxuridine	0.348507	5	0.0466724		READ	0.0921303	167	0.00146978
										Hydroxyurea	0.23926	5	.200*		SARC	0.0440252	263	.200*
										Uracil mustard	0.206378	5	.200*		SKCM	0.0540652	471	0.00220048
										Dacarbazine	0.35545	5	0.0378832		STAD	0.0485312	375	0.0336833
										Vinblastine	0.299038	5	0.164151		TGCT	0.0499722	156	.200*
										Acetalax	0.373884	5	0.0212218		THCA	0.0615717	510	8.77087e-05
										Cytarabine	0.244803	5	.200*		THYM	0.0893475	119	0.0207357
										Vincristine	0.180513	5	.200*		UCEC	0.0408058	548	0.0298295
										Megestrol acetate	0.47264	5	0.000506208		UCS	0.110679	56	0.0846625
										tfdu	0.238852	5	.200*		UVM	0.117416	80	0.00827329
										Procarbazine	0.47264	5	0.000506208
										Lomustine	0.282423	5	.200*
										Daunorubicin	0.239185	5	.200*
										Daunorubicin	0.277081	5	.200*
										Calusterone	0.252942	5	.200*
										Estramustine	0.316864	5	0.112495
										Vinblastine	0.261572	5	.200*
										Fluphenazine	0.47264	5	0.000506208
										Arsenic trioxide	0.295012	5	0.178527
										Azacitidine	0.34287	5	0.0550745
										Cladribine	0.241923	5	.200*
										Mithramycin	0.302496	5	0.151799
										Asparaginase	0.180707	5	.200*
										Ifosfamide	0.20074	5	.200*
										Acetalax	0.330268	5	0.0787431
										Fludarabine	0.255069	5	.200*
										Cisplatin	0.164075	5	.200*
										Isotretinoin	0.18798	5	.200*
										Teniposide	0.211711	5	.200*
										Doxorubicin	0.17174	5	.200*
										Fludarabine	0.227171	5	.200*
										Bleomycin	0.163213	5	.200*
										Paclitaxel	0.250085	5	.200*
										Decitabine	0.346066	5	0.0501622
										Mitomycin	0.303917	5	0.147519
										Bendamustine	0.337884	5	0.0635745
										Etoposide	0.247585	5	.200*
										Homoharringtonine	0.1925	5	.200*
										Mithramycin	0.338365	5	0.0627073
										Tegafur	0.179882	5	.200*
										Parthenolide	0.285898	5	.200*
										Dexrazoxane	0.222917	5	.200*
										Tamoxifen	0.215647	5	.200*
										Pentostatin	0.348833	5	0.0462236
										Rapamycin	0.216824	5	.200*
										Carboplatin	0.262385	5	.200*
										Idarubicin	0.143422	5	.200*
										Mitoxantrone	0.365964	5	0.0273451
										Cytarabine	0.216119	5	.200*
										Mitoxantrone	0.196787	5	.200*
										Fludarabine	0.212076	5	.200*
										Imiquimod	0.234833	5	.200*
										Carmustine	0.18846	5	.200*
										Mithramycin	0.38141	5	0.0165735
										Rapamycin	0.350413	5	0.0440977
										Clofarabine	0.250687	5	.200*
										Vinorelbine	0.347687	5	0.0478205
										Topotecan	0.242818	5	.200*
										Gemcitabine	0.208282	5	.200*
										bisacodyl, active ingredient of viraplex	0.393143	5	0.0111343
										Irinotecan	0.328705	5	0.0822146
										Depsipeptide	0.434137	5	0.00246527
										Raltitrexed	0.290629	5	0.194182
										7-Ethyl-10-hydroxycamptothecin	0.225298	5	.200*
										Bortezomib	0.188041	5	.200*
										Irofulven	0.257336	5	.200*
										Temsirolimus	0.296947	5	0.171619
										Denileukin Diftitox Ontak	0.47264	5	0.000506208
										Pemetrexed	0.230308	5	.200*
										Vorinostat	0.267459	5	.200*
										Arsenic trioxide	0.344698	5	0.052215
										Eribulin mesilate	0.2097	5	.200*
										Gefitinib	0.273747	5	.200*
										Erlotinib	0.240953	5	.200*
										Fulvestrant	0.448914	5	0.00136867
										Celecoxib	0.147431	5	.200*
										Zoledronate	0.262392	5	.200*
										Belinostat	0.291897	5	0.189654
										Lapatinib	0.214813	5	.200*
										Irinotecan	0.218842	5	.200*
										Dasatinib	0.174215	5	.200*
										Everolimus	0.43509	5	0.00237515
										Pazopanib	0.252172	5	.200*
										Imatinib	0.368692	5	0.0250781
										Lapatinib	0.130576	5	.200*
										Nelfinavir	0.258112	5	.200*
										Nilotinib	0.386281	5	0.0140762
										Olaparib	0.344466	5	0.0525715
										Ixabepilone	0.300109	5	0.160324
										Raloxifene	0.291734	5	0.190235
										Abiraterone	0.253043	5	.200*
										Sunitinib	0.283613	5	.200*
										Afatinib	0.265115	5	.200*
										Pazopanib	0.234302	5	.200*
										Olaparib	0.293378	5	0.184364
										Depsipeptide	0.47264	5	0.000506208
										Pralatrexate		5
										Pemetrexed	0.248685	5	.200*
										Vismodegib	0.321369	5	0.100308
										Actinomycin D	0.47264	5	0.000506208
										Mitomycin	0.307877	5	0.136806
										Lenvatinib	0.366641	5	0.0267664
										Nelarabine		5
										Crizotinib	0.285626	5	.200*
										Daunorubicin	0.257554	5	.200*
										Digoxin	0.225586	5	.200*
										Ethinyl estradiol	0.189537	5	.200*
										Fluorouracil	0.213586	5	.200*
										Nitrogen mustard	0.245522	5	.200*
										Melphalan	0.196722	5	.200*
										6-Mercaptopurine	0.154132	5	.200*
										Tyrothricin	0.451359	5	0.00123885
										Vinblastine	0.47264	5	0.000506208
										Cabozantinib	0.277129	5	.200*
										Axitinib	0.286196	5	.200*
										Etoposide	0.20857	5	.200*
										Azacitidine	0.123966	5	.200*
										Floxuridine	0.363904	5	0.0291764
										Trametinib	0.209544	5	.200*
										Palbociclib	0.243846	5	.200*
										Carfilzomib	0.330943	5	0.0772827
										Homoharringtonine	0.227635	5	.200*
										Ixazomib citrate	0.198833	5	.200*
										Teniposide	0.18552	5	.200*
										Ponatinib	0.337197	5	0.0648301
										Bleomycin	0.176364	5	.200*
										Paclitaxel	0.323844	5	0.0938559
										Rapamycin	0.242853	5	.200*
										Teniposide	0.286051	5	.200*
										Simvastatin	0.254112	5	.200*
										Belinostat	0.434333	5	0.00244645
										Doxorubicin	0.228867	5	.200*
										Vincristine	0.334454	5	0.070061
										Pipamperone	0.175509	5	.200*
										Epirubicin	0.17184	5	.200*
										Idelalisib	0.264508	5	.200*
										Topotecan	0.242984	5	.200*
										Arsenic trioxide	0.294013	5	0.182095
										6-Mercaptopurine	0.149555	5	.200*
										Docetaxel	0.315014	5	0.117499
										Vorinostat	0.231457	5	.200*
										Gefitinib	0.210627	5	.200*
										Clofarabine	0.189935	5	.200*
										Dasatinib	0.22967	5	.200*
										Irinotecan	0.223019	5	.200*
										Vinorelbine	0.341716	5	0.0569476
										Vandetanib	0.312391	5	0.124596
										Cabozantinib	0.342643	5	0.055439
										Panobinostat	0.29281	5	0.186393
										Sonidegib	0.230511	5	.200*
										Vemurafenib	0.247525	5	.200*
										Ibrutinib	0.253615	5	.200*
										Alectinib	0.318224	5	0.108816
										Dabrafenib	0.377631	5	0.0187785
										Bosutinib	0.256131	5	.200*
										ABT-199	0.295406	5	0.177123
										LDK-378	0.351597	5	0.042561
										LDK-378	0.210717	5	.200*
										AZD-9291	0.279444	5	.200*
